# Supplementary material for: GLP-1 RA Improves Diabetic Retinopathy by Protecting the Blood-Retinal Barrier through GLP-1R-ROCK-p-MLC Signaling Pathway
Source: Hindawi journal article supplement (doi:10.1155/2022/1861940), 2022-11-03
Supplement: f1 [file 1861940.f1.pdf]

Figure 3 shows the results of transmission electron microscopy, with the measurement scale under the figure.

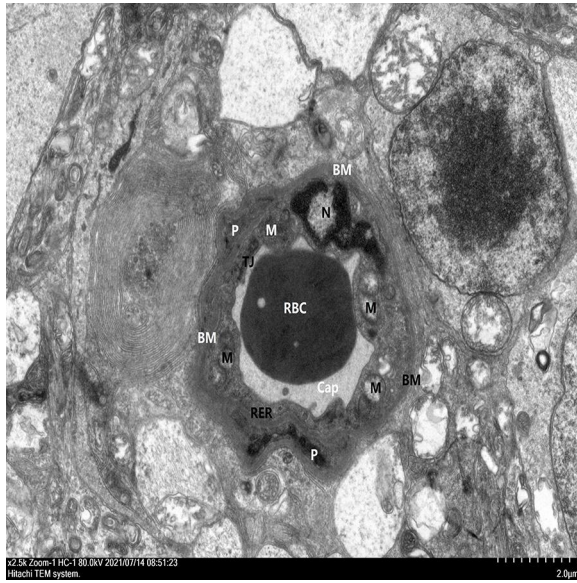

N 2500x

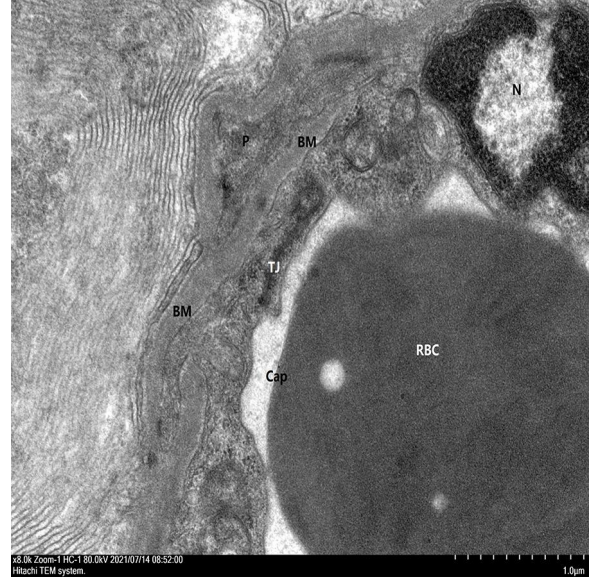

N 8000x

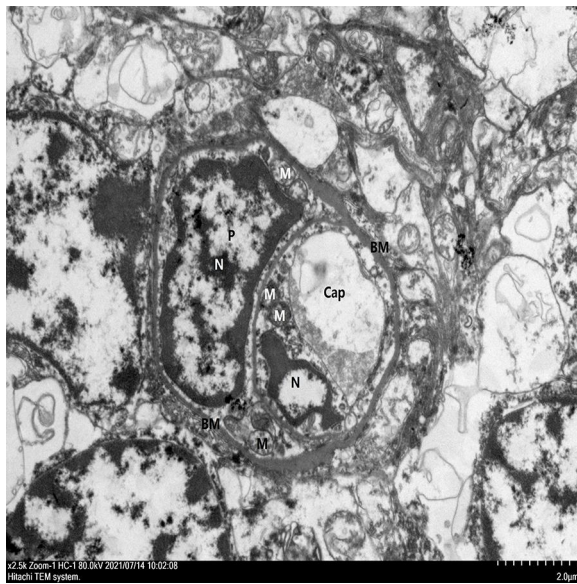

HG 2500x

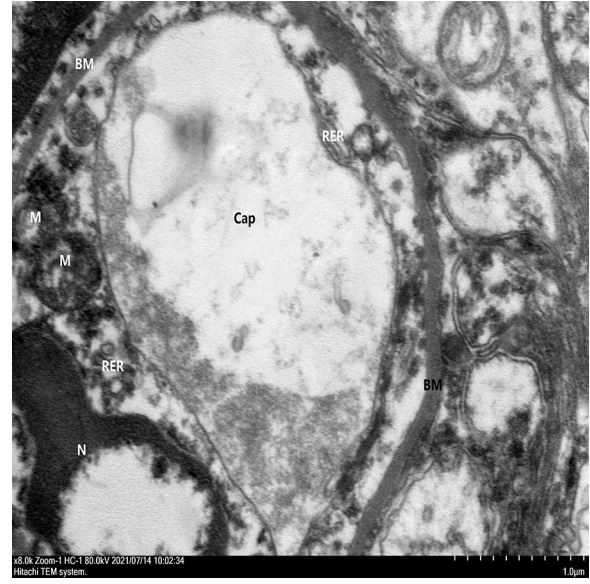

HG 8000x

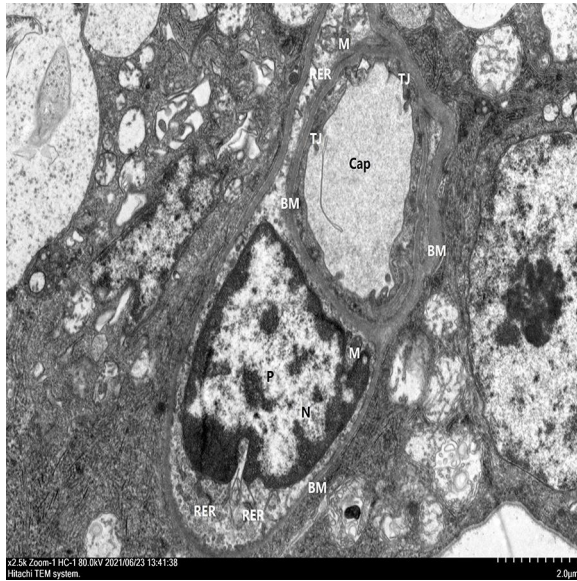

600 2500x

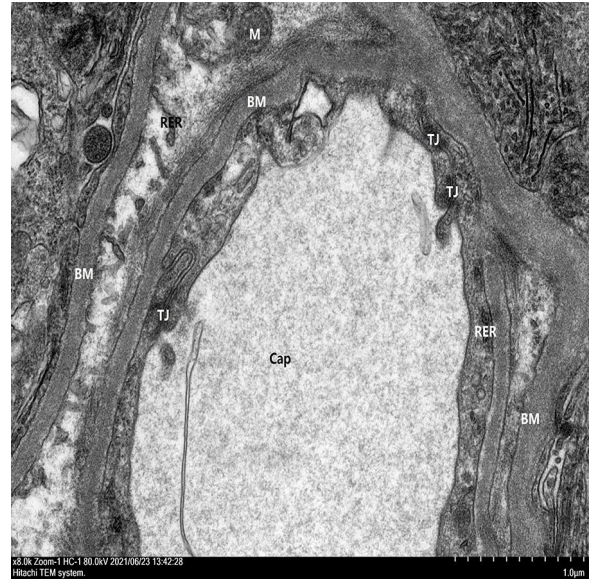

600 8000x

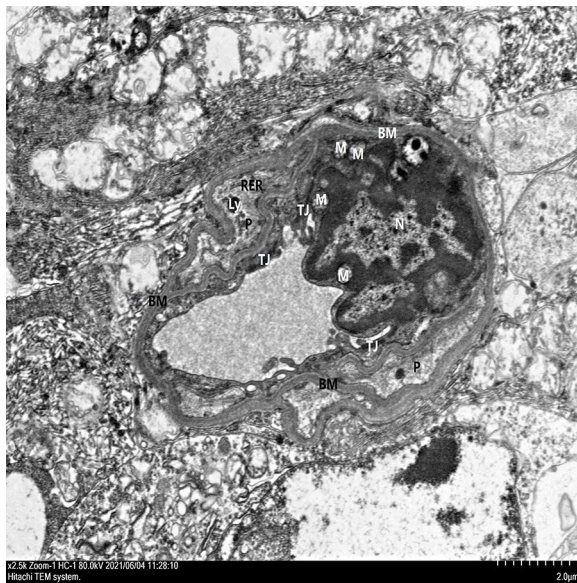

1000 2500x

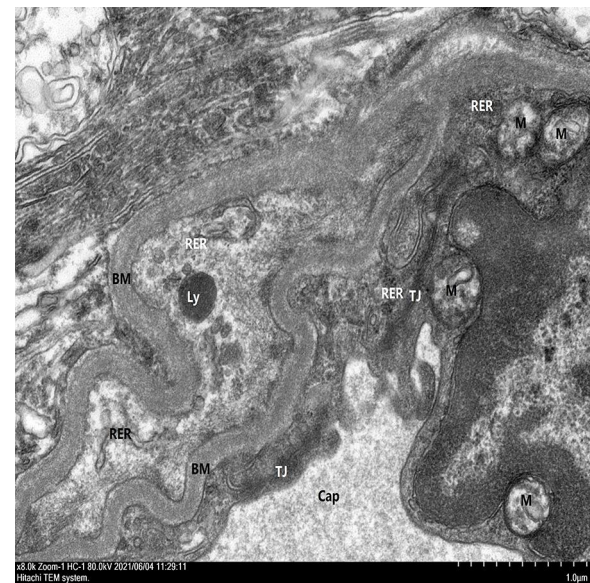

1000 8000x
